# Supplementary material for: Deep oxidative desulfurization of model fuels catalyzed by polyoxometalates anchored on amine-functionalized ceria doped MCM-41 with molecular oxygen
Source: Royal Society of Chemistry journal article supplement (doi:10.1039/c9nj06271h), 2020-01-01
Supplement: c9nj06271h1.pdf [file c9nj06271h1.pdf]

## Supplementary Information

### **Deep oxidative desulfurization of model fuel catalyzed by polyoxometalates anchored on amine-functionalized ceria doped MCM-41 under molecular oxygen**

**Chaowei Wang<sup>a</sup>, Zhe Liu<sup>a</sup>, Ruimin Gao<sup>b</sup>, Jinhua Liu<sup>a</sup>, Siying An<sup>a</sup>, Ronglan Zhang<sup>a</sup>, Jianshe Zhao<sup>a\*</sup>**

<sup>a</sup> Key Laboratory of Synthetic and Natural Functional Molecule Chemistry of Ministry of Education, Shaanxi Key Laboratory of Physico-Inorganic Chemistry, College of Chemistry & Materials Science, Northwest University, Xi'an 710069, China

<sup>b</sup> Research Institute of Shaanxi Yanchang Petroleum Group Corp. Ltd., Xi'an 710075, China

\*Corresponding author.

E-mail: jszhao@nwu.edu.cn

**Table S1.** ICP results of different catalysts.

| Catalyst                                            | W <sup>a</sup> (wt%) | V <sup>a</sup> (wt%) | W/V<br>(mol ratio) | POM <sup>b</sup><br>(wt%) |
|-----------------------------------------------------|----------------------|----------------------|--------------------|---------------------------|
| 10 wt% PW <sub>9</sub> V <sub>3</sub> /APTES-CeM-50 | 5.35                 | 0.49                 | 3.03               | 8.91                      |
| 20 wt% PW <sub>9</sub> V <sub>3</sub> /APTES-CeM-50 | 11.47                | 1.06                 | 3.00               | 19.12                     |
| 30 wt% PW <sub>9</sub> V <sub>3</sub> /APTES-CeM-50 | 17.12                | 1.58                 | 2.99               | 28.53                     |
| 40 wt% PW <sub>9</sub> V <sub>3</sub> /APTES-CeM-50 | 23.25                | 2.15                 | 3.00               | 38.75                     |
| 50 wt% PW <sub>9</sub> V <sub>3</sub> /APTES-CeM-50 | 27.94                | 2.58                 | 2.99               | 46.57                     |
| 30 wt% PW <sub>9</sub> V <sub>3</sub> /CeM-50       | 10.11                | 0.94                 | 3.00               | 16.83                     |
| After used 8 times                                  | 12.98                | 1.20                 | 3.00               | 21.63                     |

<sup>a</sup> As tested by ICP-AES analysis.

<sup>b</sup> As calculated from the ICP-AES results.

**Table S2.** APTES amounts of different catalysts.

| Sample                                              | Amine <sup>a</sup> (mmol/g) |
|-----------------------------------------------------|-----------------------------|
| CeM-50                                              | 0                           |
| APTES-CeM-50                                        | 4.2                         |
| 30 wt% PW <sub>9</sub> V <sub>3</sub> /APTES-CeM-50 | 4.2                         |

<sup>a</sup> As obtained according to TG method. The unit of amine amount is mmol amine/g CeM.

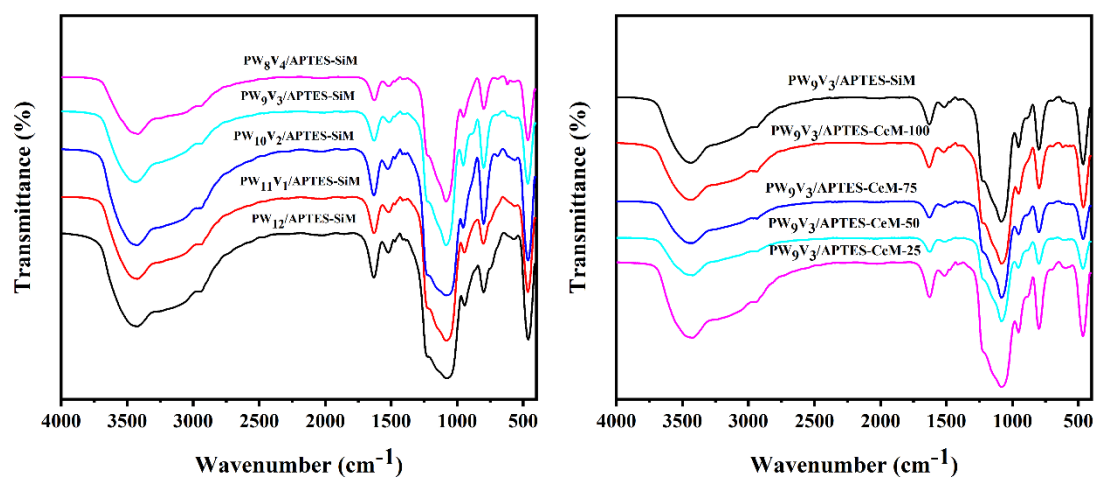**Fig. S1.** FT-IR spectra of POM/APTES-SiM and PW<sub>9</sub>V<sub>3</sub>/APTES-CeM.

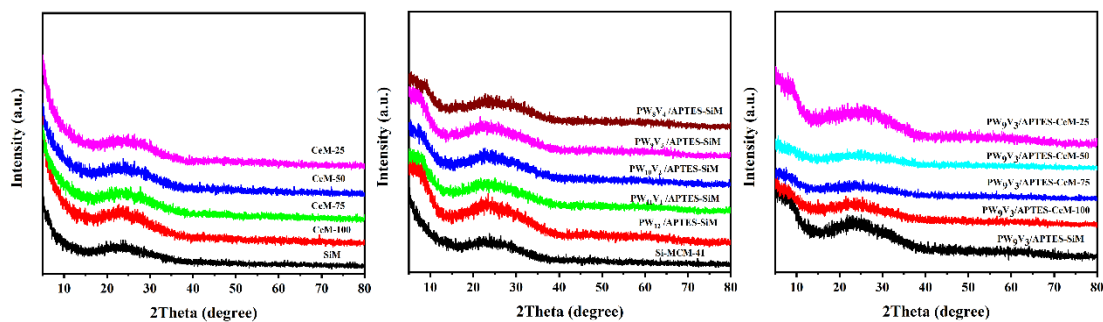

**Fig. S2.** XRD spectra of POM/APTES-SiM and  $PW_9V_3/APTES-CeM$ .

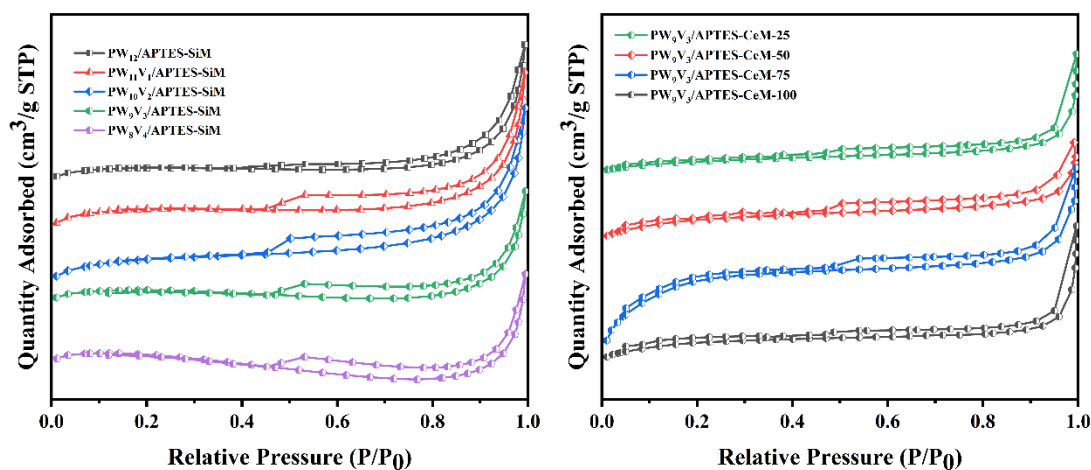

**Fig. S3.** Nitrogen adsorption-desorption isotherms of POM/APTES-SiM and  $PW_9V_3/APTES-CeM$ .

**Table S3.** Textural properties of POM/APTES-SiM and  $PW_9V_3/APTES-CeM$ .

| Sample                  | $S_{BET}$ ( $m^2/g$ ) | $V_P$ ( $cm^3/g$ ) | $D_P$ (nm) |
|-------------------------|-----------------------|--------------------|------------|
| $PW_{12}/APTES-SiM$     | 297                   | 0.415              | 2.88       |
| $PW_{11}V_1/APTES-SiM$  | 292                   | 0.399              | 2.89       |
| $PW_{10}V_2/APTES-SiM$  | 286                   | 0.381              | 2.84       |
| $PW_9V_3/APTES-SiM$     | 274                   | 0.362              | 2.81       |
| $PW_8V_4/APTES-SiM$     | 283                   | 0.374              | 2.85       |
| $PW_9V_3/APTES-CeM-100$ | 258                   | 0.358              | 2.80       |
| $PW_9V_3/APTES-CeM-75$  | 245                   | 0.341              | 2.76       |
| $PW_9V_3/APTES-CeM-50$  | 233                   | 0.328              | 2.74       |
| $PW_9V_3/APTES-CeM-25$  | 186                   | 0.293              | 2.67       |

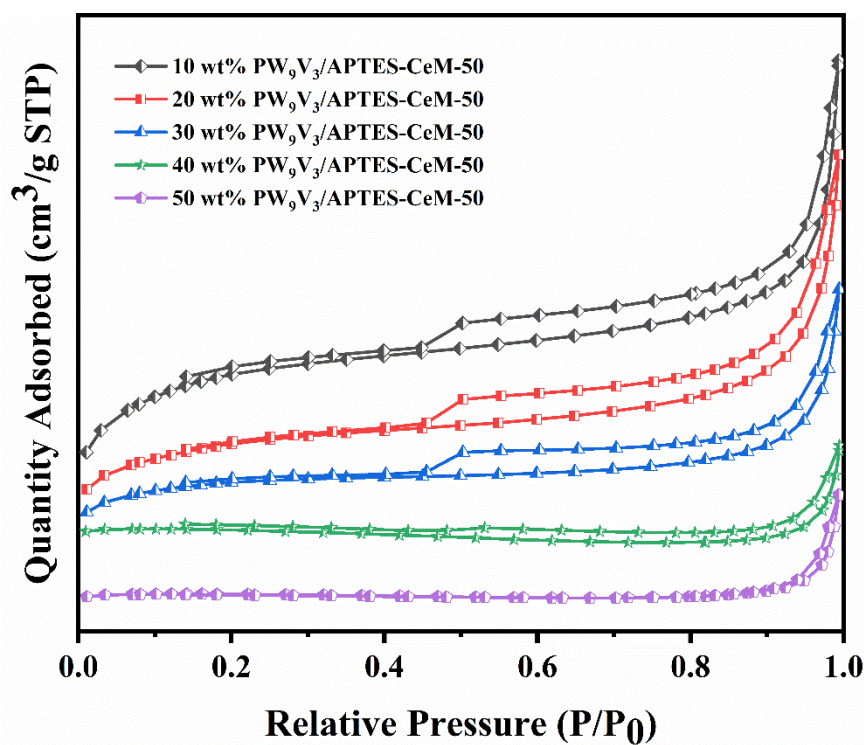

**Fig. S4.** Nitrogen adsorption-desorption isotherms of the 10-50 wt%  $\text{PW}_9\text{V}_3/\text{APTES-CeM-50}$  catalysts.

**Table S4.** Textural properties of the 10-50 wt%  $\text{PW}_9\text{V}_3/\text{APTES-CeM-50}$  catalysts.

| Sample                                             | $S_{\text{BET}}$ ( $\text{m}^2/\text{g}$ ) | $V_{\text{P}}$ ( $\text{cm}^3/\text{g}$ ) | $D_{\text{P}}$ (nm) |
|----------------------------------------------------|--------------------------------------------|-------------------------------------------|---------------------|
| 10 wt% $\text{PW}_9\text{V}_3/\text{APTES-CeM-50}$ | 536                                        | 0.476                                     | 2.90                |
| 20 wt% $\text{PW}_9\text{V}_3/\text{APTES-CeM-50}$ | 374                                        | 0.391                                     | 2.83                |
| 30 wt% $\text{PW}_9\text{V}_3/\text{APTES-CeM-50}$ | 233                                        | 0.328                                     | 2.74                |
| 40 wt% $\text{PW}_9\text{V}_3/\text{APTES-CeM-50}$ | 108                                        | 0.249                                     | 2.68                |
| 50 wt% $\text{PW}_9\text{V}_3/\text{APTES-CeM-50}$ | 67                                         | 0.195                                     | 2.63                |

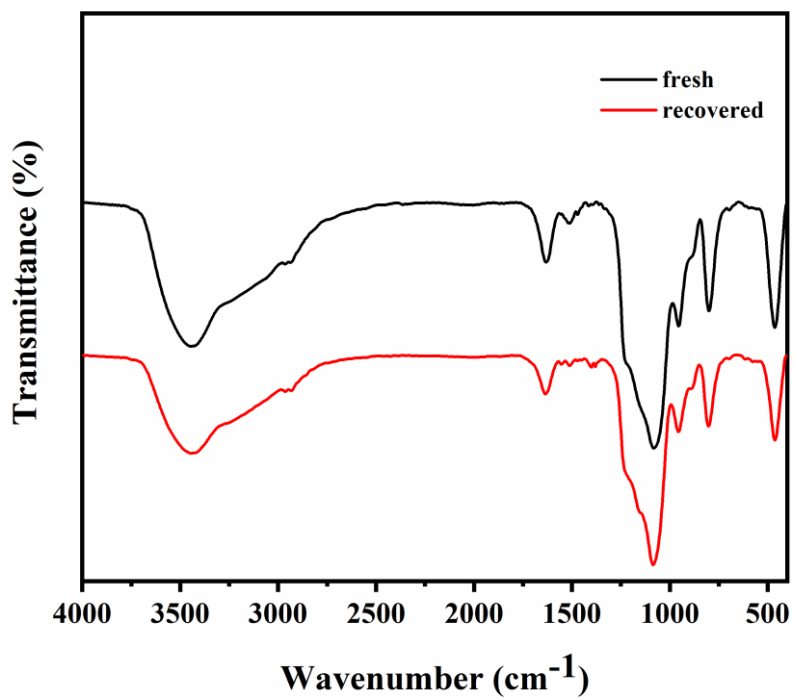

**Fig. S5.** FT-IR spectra of the fresh and after used 8 times catalyst.

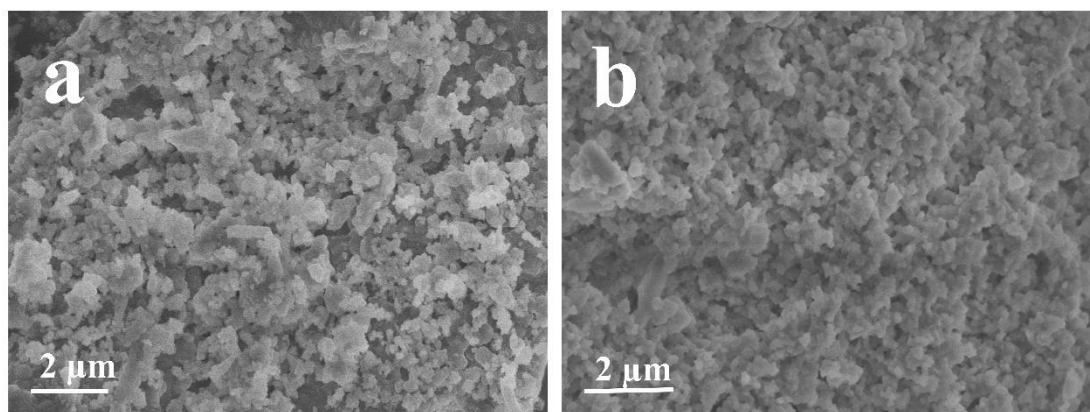

**Fig. S6.** SEM images of the (a) fresh and (b) after used 8 times catalyst.

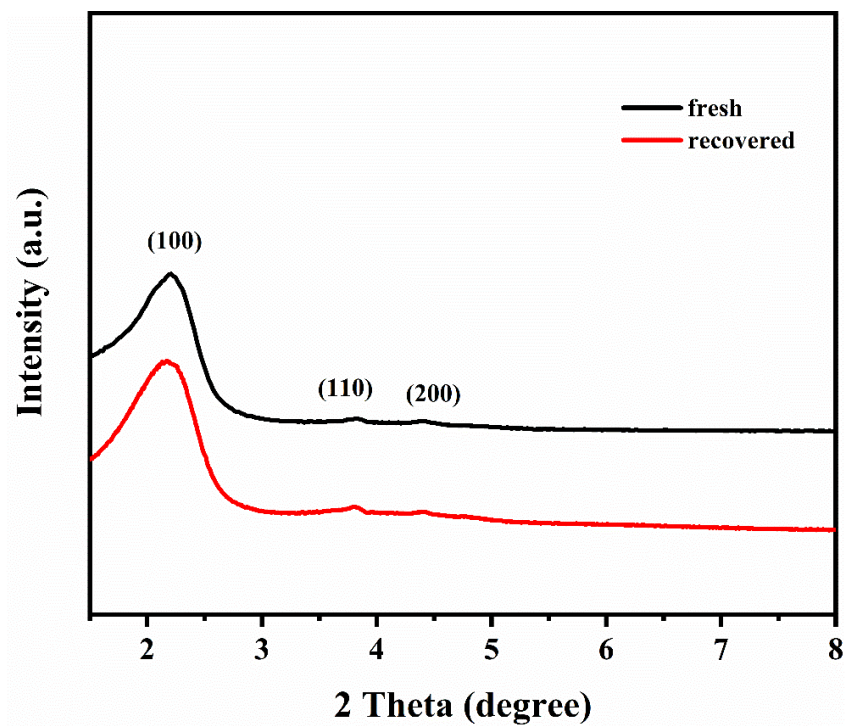

Fig. S7. Low angel XRD patterns of the fresh and after used 8 times catalyst.

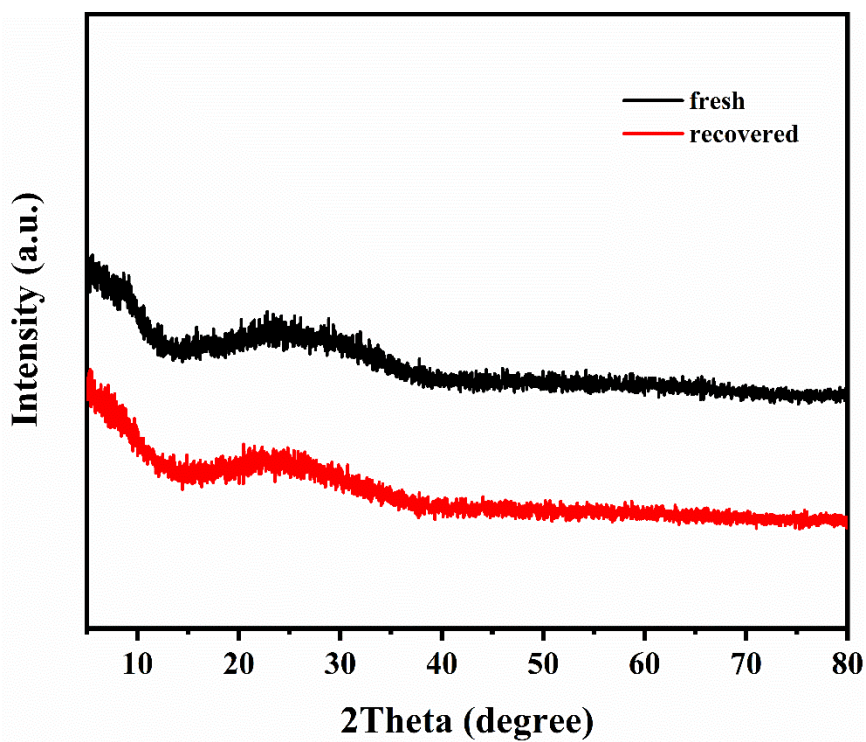

Fig. S8. Wide angel XRD patterns of the fresh and after used 8 times catalyst.

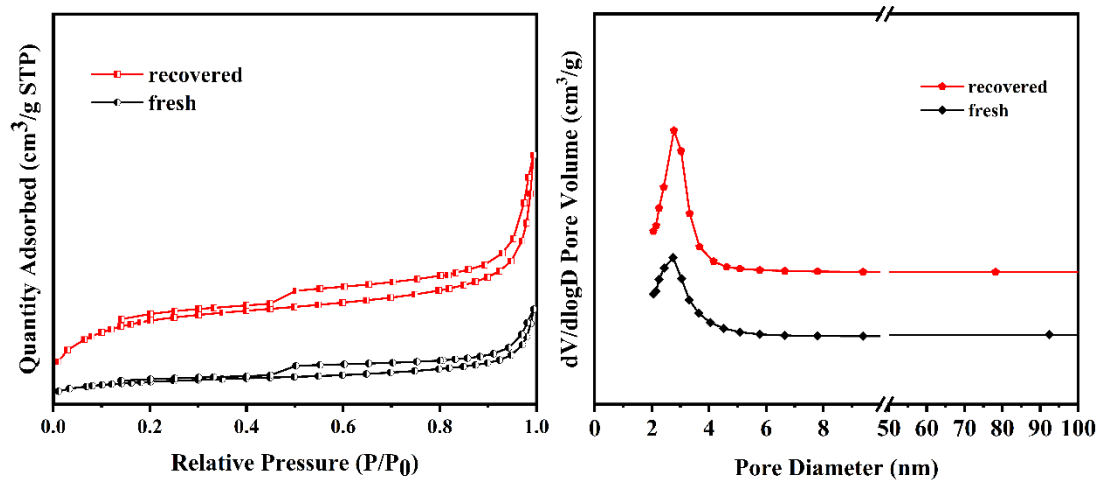

**Fig. S9.** Nitrogen adsorption-desorption isotherms and BJH pore size distribution curves of the fresh and after used 8 times catalyst.

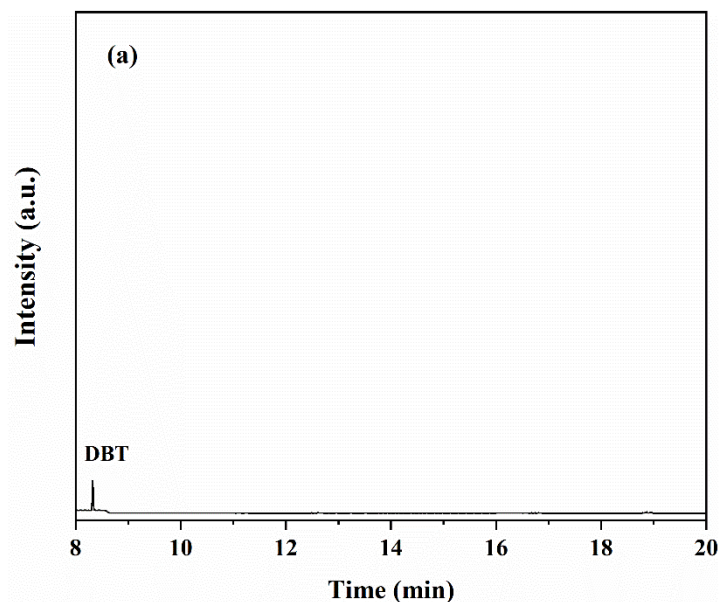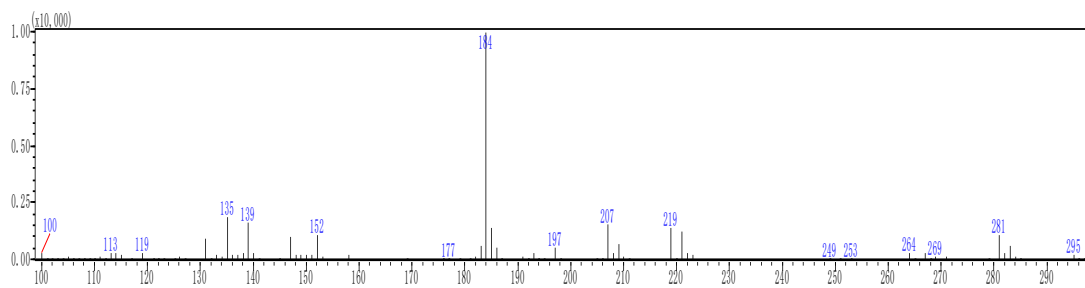

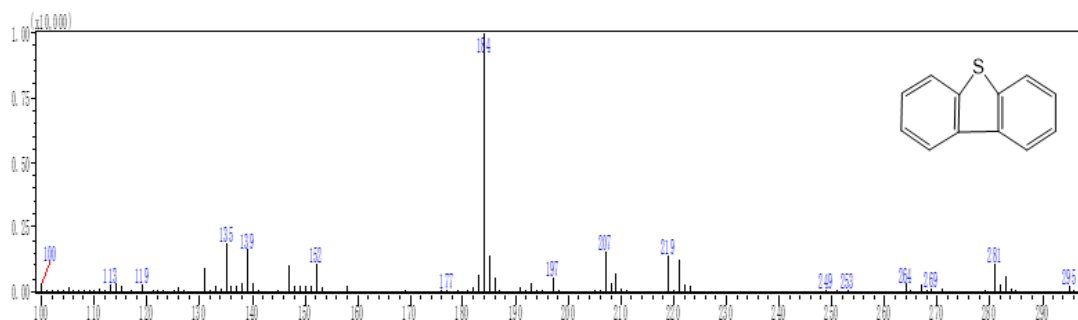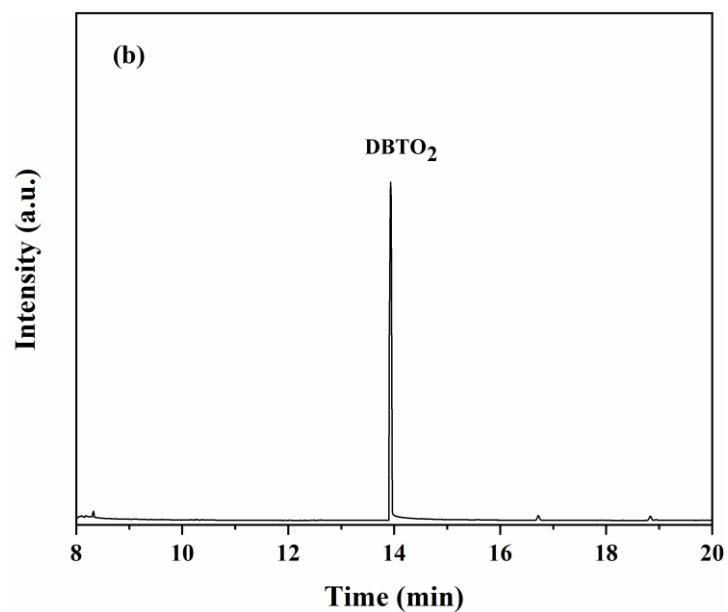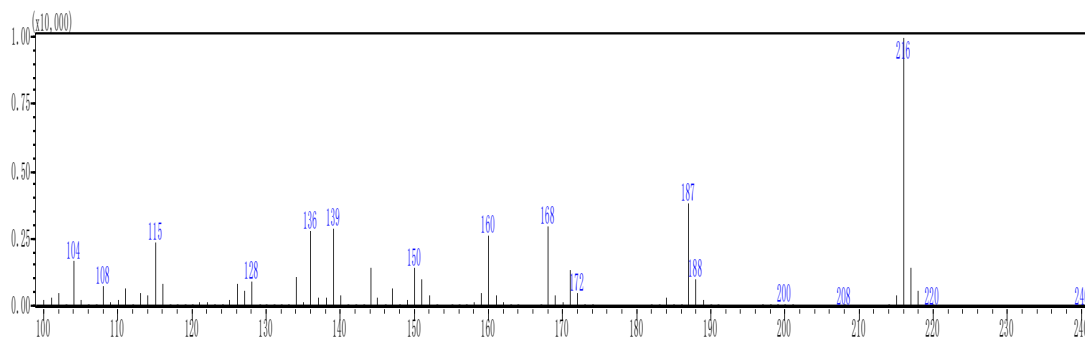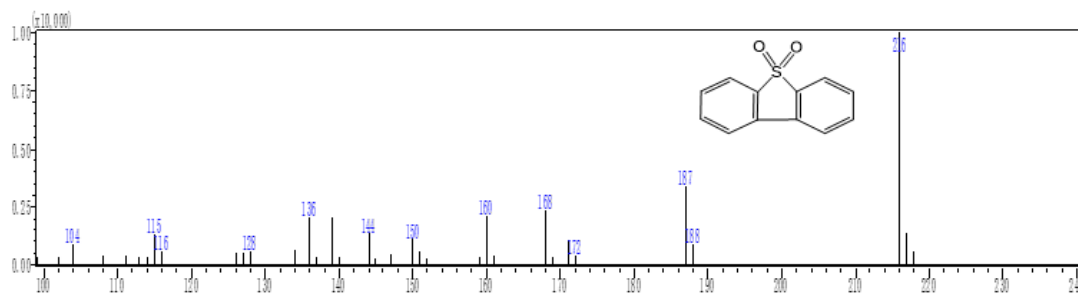

**Fig. S10.** The GC-MS analysis of the product after ODS. (a) oil phase, (b) CH<sub>3</sub>CN phase.



**Table S5.** The kinetic data of different reaction temperature.

| Temperature/°C | Rate constant k/min <sup>-1</sup> | Correlation factor R <sup>2</sup> |
|----------------|-----------------------------------|-----------------------------------|
| 50             | 0.00905                           | 0.99132                           |
| 60             | 0.01208                           | 0.98763                           |
| 70             | 0.01596                           | 0.99221                           |
| 80             | 0.02481                           | 0.99732                           |

**Table S6.** The comparison between ODS results of different POM based catalysts.

| Catalyst                                                          | Oxidant                                            | Temperature/<br>°C | DBT<br>conversion/% | Reference |
|-------------------------------------------------------------------|----------------------------------------------------|--------------------|---------------------|-----------|
| Ag-POM/SWNTs                                                      | H <sub>2</sub> O <sub>2</sub>                      | 20                 | 98.9                | S1        |
| K <sub>6</sub> P <sub>2</sub> W <sub>18</sub> O <sub>62</sub> /GO | Air                                                | 60                 | 96.10               | S2        |
| HPMo/C                                                            | H <sub>2</sub> O <sub>2</sub>                      | 60                 | 100                 | S3        |
| HPW@MOFs                                                          | O <sub>2</sub>                                     | 90                 | 90                  | S4        |
| HPW/MgAl-LDH-DBS <sup>a</sup>                                     | H <sub>2</sub> O <sub>2</sub>                      | 60                 | 99.81               | S5        |
| H <sub>8</sub> PV <sub>5</sub> Mo <sub>7</sub> O <sub>40</sub>    | O <sub>2</sub>                                     | 120                | 99                  | S6        |
| (TBA) <sub>4</sub> PW <sub>11</sub> Fe@PbO <sup>b</sup>           | CH <sub>3</sub> COOH/H <sub>2</sub> O <sub>2</sub> | 60                 | 97                  | S7        |
| CNTs@MOF-Mo <sub>16</sub> V <sub>2</sub>                          | O <sub>2</sub>                                     | 80                 | 98.30               | S8        |
| PW <sub>9</sub> V <sub>3</sub> /APTES-CeM-50                      | O <sub>2</sub>                                     | 80                 | 99.26               | This work |

<sup>a</sup> This catalyst represents the phosphotungstic acid (HPW) supported the sodium dodecyl benzene sulfonate (SDBS) modified layered double hydroxides (LDH).

<sup>b</sup> This catalyst means a tetra(n-butyl)ammonium salt of iron-substituted phosphotungstate@lead oxide composite.

#### Reference

- S1 H. Zhang, X. Xu, H. Lin, Din, A. U. M, H. Wang and X. Wang, *Nanoscale*, 2017, **9**, 13334-13340.
- S2 S. Dou and R. Wang, *New J. Chem.*, 2019, **43**, 3226-3235
- S3 R. Ghubayra, C. Nuttall, S. Hodgkiss, M. Craven, E. F. Kozhevnikova and I. V. Kozhevnikov, *Appl. Catal., B*, 2019, **253**, 309-316.

- S4 J. W. Ding and R. Wang, *Chin. Chem. Lett.*, 2016, **27**(5), 655-658.
- S5 P. Huang, A. Liu, L. Kang, M. Zhu and B. Dai, *New J. Chem.*, 2018, **42**, 12830-12837.
- S6 B. Bertleff, J. Claußnitzer, W. Korth, P. Wasserscheid, A. Jess and J. Albert, *ACS Sustainable Chem. Eng.*, 2017, **5**(5), 4110-4118.
- S7 M. A. Rezvani, S. Khandan and N. Sabahi, *Energy Fuels*, 2017, **31**, 5472-5481.
- S8 Y. Gao, Z. Lv, R. Gao, G. Zhang, Y. Zheng and J. Zhao, *J. Hazard. Mater.*, 2018, **359**, 258-265.
